# Supplementary material
Source: PubMed Central journal article supplement (PMC2650362)
Supplement: 0808776106_0808776106SI.pdf [file 0808776106_0808776106SI.pdf]

# Supporting Information

Rubin et al. 10.1073/pnas.0808776106

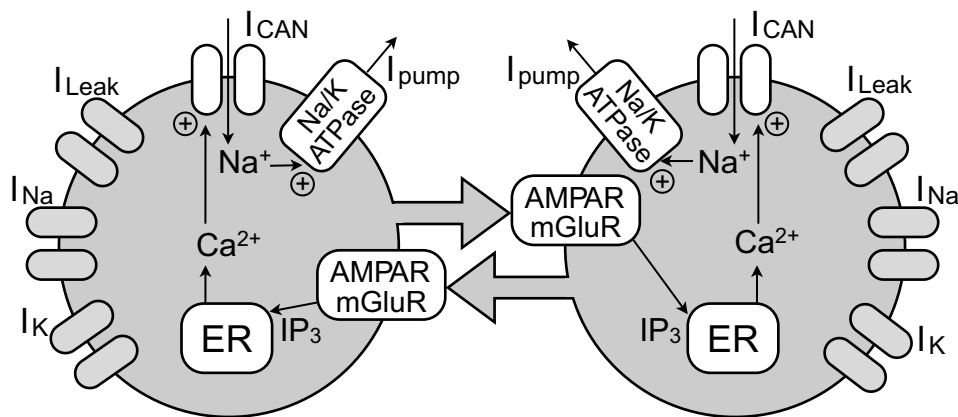

**Fig. S1.** Schematic diagram of the model. Reciprocally coupled neurons motivated by respiratory neurons of the mammalian preBötC were equipped with Hodgkin-Huxley-style “fast”  $\text{Na}^+$  and delayed-rectifier  $\text{K}^+$  currents ( $I_{\text{Na}}$ ,  $I_{\text{K}}$ ), and a  $\text{K}^+$ -dominated leakage current ( $I_{\text{Leak}}$ ).  $I_{\text{Na}}$ ,  $I_{\text{K}}$ , and  $I_{\text{Leak}}$  are shaded gray to indicate that their role is mostly in setting resting potential and generating spikes. As discussed in the text, the bursting dynamics in the model depend on a  $\text{Ca}^{2+}$ -activated nonspecific cationic current ( $I_{\text{CAN}}$ ), material balance equations that determine the intracellular concentrations of  $\text{Ca}^{2+}$  and  $\text{Na}^+$ , and some type of activity-dependent net outward current (Figs. 3 and 4 and Figs. S3 and S4). In the basic model illustrated, the net outward current is mediated by an Na/K ATPase pump ( $I_{\text{pump}}$ ), as analyzed in Figs. 3, S3A, and S4A. Other net outward currents included a voltage-dependent M-like  $\text{K}^+$  current ( $I_{\text{M}}$ , Fig. 4A and Figs. S3B and S4B),  $\text{Ca}^{2+}$ -dependent  $\text{K}^+$  current ( $I_{\text{K-Ca}}$ , Fig. 4B and Figs. S3C and S4C), and voltage-dependent inactivation of inward persistent  $\text{Na}^+$  current ( $I_{\text{NaP}}$ , Fig. 4C and Figs. S3D and S4D).

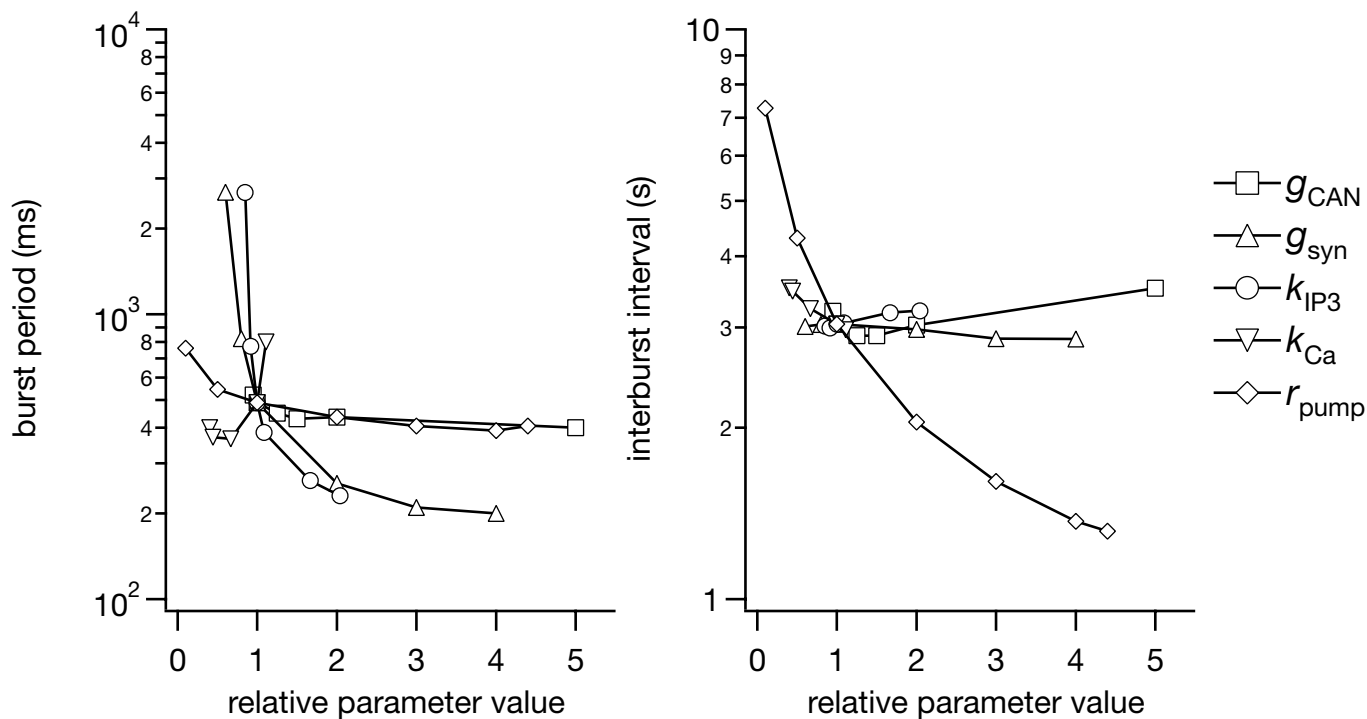

**Fig. 52.** Robustness parameter study in the self-coupled model with  $I_{pump}$ . Burst period (Left) and interburst interval (Right), plotted over the range of each parameter for which the self-coupled neuron generated rhythmic bursts. Such bursts were defined as trajectories analogous to Fig. 3D, with a pair of AH crossings followed by a pair of SNIC crossings in the  $(Ca^{2+}-Na^+)$  plane in each period. Each parameter value was normalized relative to its default value (see Derivation of the model, SI Appendix). The parameters varied include:  $g_{CAN}$  (squares),  $g_{syn}$  (upward triangles),  $k_{IP3}$  (circles),  $k_{Ca}$  (downward triangles), and  $r_{pump}$  (diamonds).

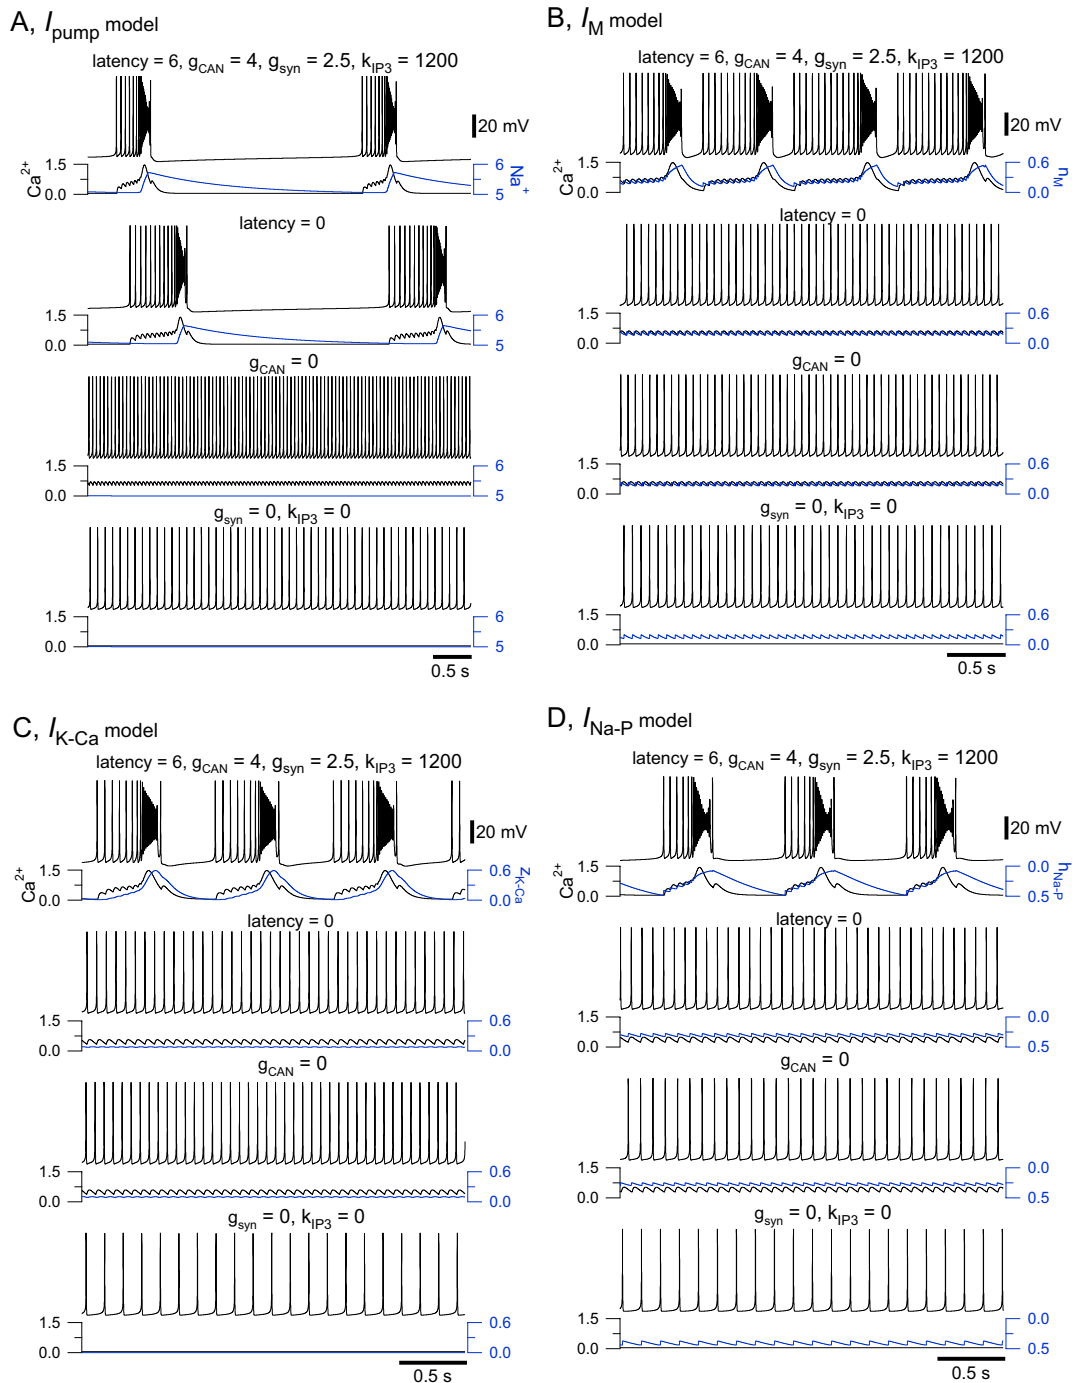

**Fig. S3.** Simulations of the self-coupled model using different net outward currents, showing that the parameters  $g_{\text{CAN}}$ ,  $g_{\text{syn}}$ , and  $k_{\text{IP3}}$  and the currents they influence are critical, regardless of which activity-dependent net outward current is used in the model. (A–D) Sets of 4 time courses of model outputs. Each sweep consists of 3 traces: membrane potential (*Upper*, black),  $\text{Ca}^{2+}$  (*Lower*, black), and the model-specific slow variable (*Lower*, blue, superimposed with  $\text{Ca}^{2+}$  dynamics). The upper sweep in each panel serves as control and lists default standard parameter values for latency,  $g_{\text{CAN}}$ ,  $g_{\text{syn}}$ , and  $k_{\text{IP3}}$ . Subsequent (*Lower*) sweeps in each panel each show results given by varying one or more of the parameters from the control condition. (A)  $I_{\text{pump}}$  model with  $\text{Na}^{+}$  as the slow variable. (B)  $I_{\text{M}}$  model with  $n_{\text{M}}$  as the slow variable. (C)  $I_{\text{K-Ca}}$  model with  $z_{\text{K-Ca}}$  as the slow variable. (D)  $I_{\text{Na-P}}$  model with  $h_{\text{Na-P}}$  as the slow variable.

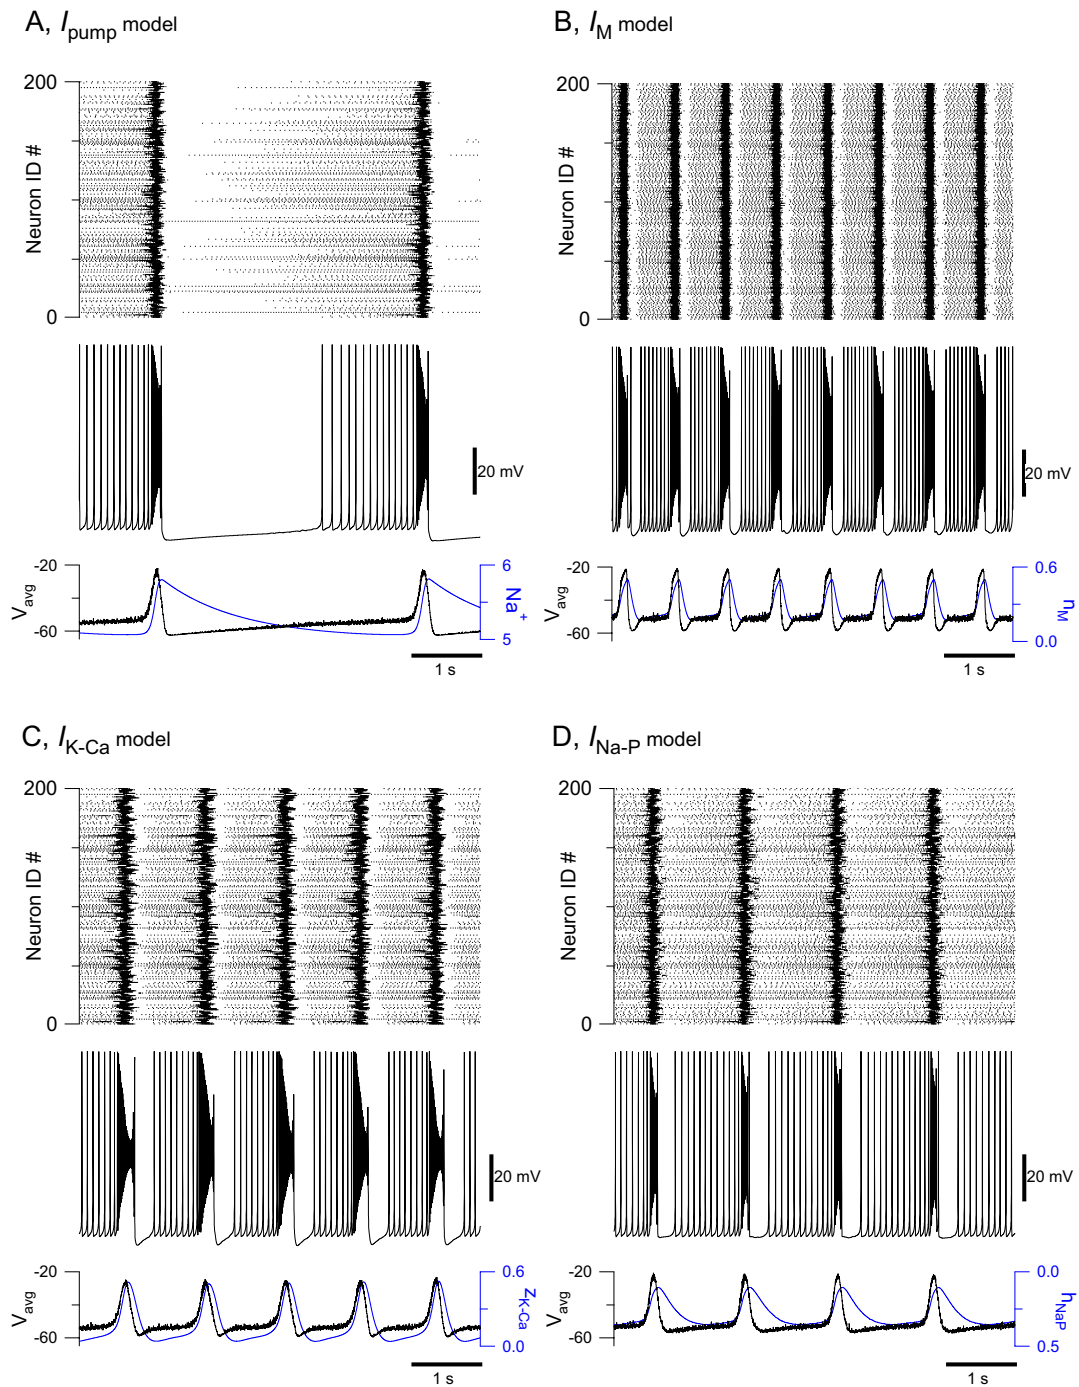

**Fig. S4.** Rhythmic burst activity in large-scale network models. Each panel consists of a raster diagram (*Top*) showing the spike times of 200 simulated neurons, the voltage trajectory of a representative neuron (*Middle*), the average membrane voltage for all neurons in the network (*Bottom*, black) along with the average slow variable (blue). (*A–D*) Network activity with different activity-dependent outward currents including  $I_{\text{pump}}$ , where average  $\text{Na}^+$  concentration is the slow variable (*A*),  $M$ -like  $\text{K}^+$  current ( $I_M$ ), where average  $n_M$  is the slow variable (*B*),  $\text{Ca}^{2+}$ -dependent  $\text{K}^+$  current ( $I_{\text{K-Ca}}$ ), where average  $z_{\text{K-Ca}}$  is the slow variable (*C*), and persistent  $\text{Na}^+$  current ( $I_{\text{Na-P}}$ ), where average  $h_{\text{Na-P}}$  is the slow variable (*D*).

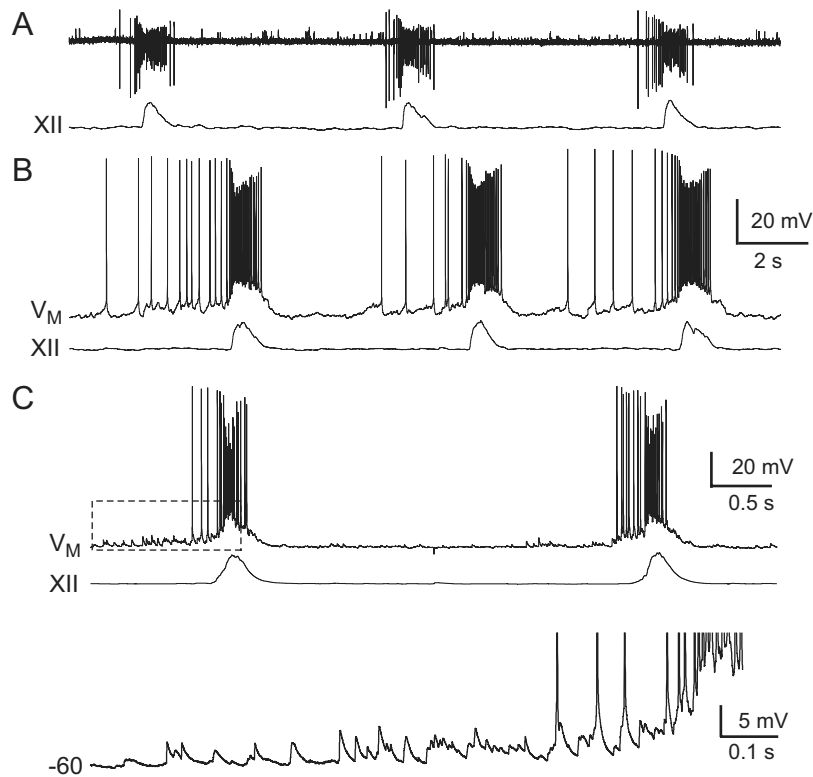

**Fig. S5.** Respiratory rhythm generation in vitro. (A) On-cell patch recording of a preBötC neuron (*Upper*) with inspiratory motor discharge recorded from the hypoglossal (XII) motor nerve root (*Lower*). (B) Whole-cell recording conditions in the same cell as A (*Upper*) with XII motor output (*Lower*). Baseline membrane potential was  $-60$  mV. (C) Two consecutive cycles in a representative preBötC neuron (top trace) with XII motor output (lower trace). Ramp-like depolarization and EPSPs occur 300–1000 ms before the inspiratory phase; spiking occurs in the final 300 ms before the inspiratory phase. Voltage-dependent spike inactivation, i.e., depolarization block, is visible during the inspiratory bursts. Temporal summation of EPSPs and low-rate ( $\approx 5$ – $10$  Hz) spiking activity in the preBötC shows evidence for recurrent synaptic excitation during respiratory rhythmogenesis. Broken lines indicate the region of the recording that is expanded in the *Inset*. (*Inset*) Illustrates temporal summation of EPSPs and preinspiratory spiking in greater detail.

## Other Supporting Information Files

[SI Appendix](#)
